# Supplementary material for: Performance and characteristics of fluoride adsorption using nanomagnetite graphite–La adsorbent
Source: Royal Society of Chemistry journal article supplement (doi:10.1039/c5ra15215a), 2015-01-01
Supplement: c5ra15215a1.pdf [file c5ra15215a1.pdf]

1

## Supporting information

2

3

### Performance and characteristics of fluoride adsorption using

4

### nanomagnetite graphite-La adsorbent

5

6

Shuangxi Wen, Yili Wang\*, Shuoxun Dong

7

Beijing Forestry University, Beijing 100083, China

8

9

**\*Corresponding author:** Yili Wang; Phone: +86-10-62336673; Fax: +86-10-

10 62336596; E-mail: [wangyilimail@126.com](mailto:wangyilimail@126.com)

11

12

---

\*Corresponding author. Tel.: +86 10 62336673; fax: +86 10 62336596.  
E-mail address: [wangyilimail@126.com](mailto:wangyilimail@126.com) (Y.L. Wang).

## 13 1 SEM images and EDX detection

14 The surface morphology of NG, MGNP, MGLNP and MGLNP loaded with fluoride  
15 was shown in Fig. S1. Fig. S1b indicated that lots of nano-Fe<sub>3</sub>O<sub>4</sub> particles were  
16 successful loaded on the NG. In Fig. S1c, the brighter regions correspond to the  
17 lanthanum particles,<sup>1</sup> that was confirmed by EDS analysis ( Fig. S2).

18

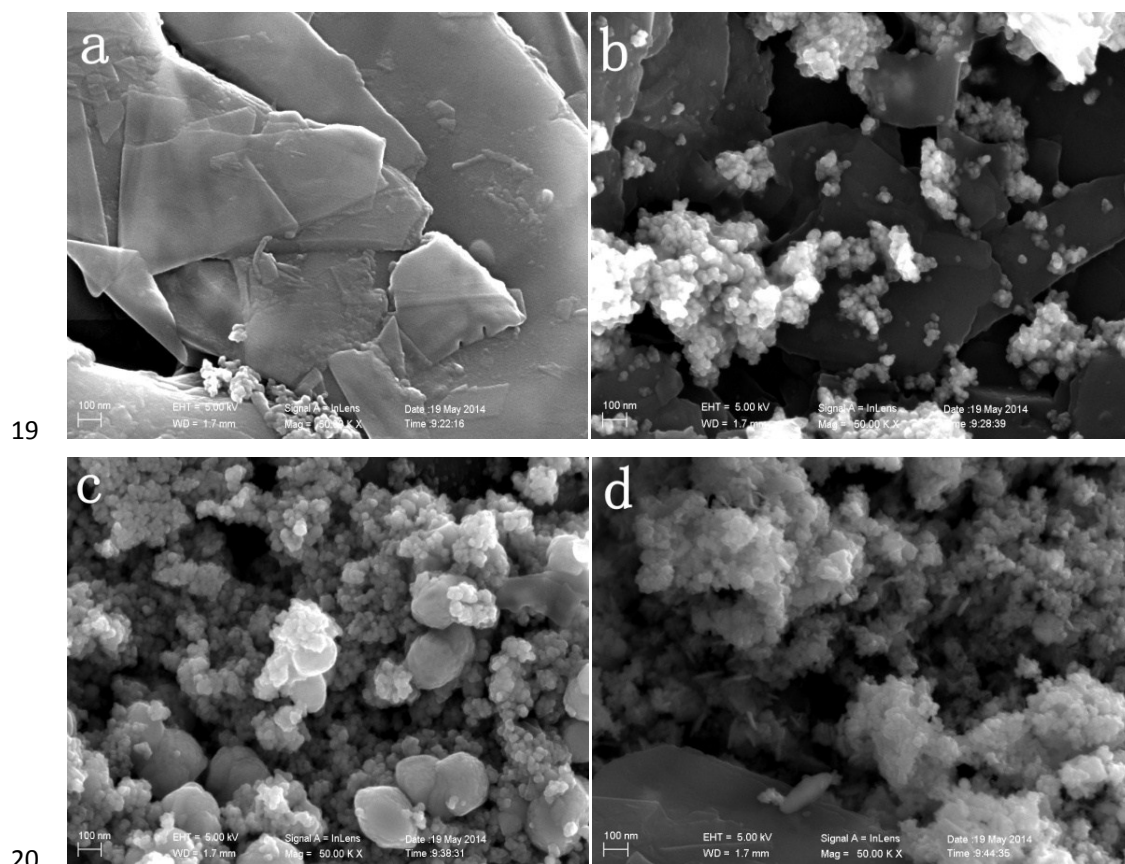

**Fig. S1.** SEM micrographs: (a) NG; (b) MGNP; (c) MGLNP and (d) F<sup>-</sup> loaded MGLNP.

Fig. S2c showed that the  $\gamma$ -Fe<sub>2</sub>O<sub>3</sub> and La ions are successfully immobilized on the surface of adsorbent.

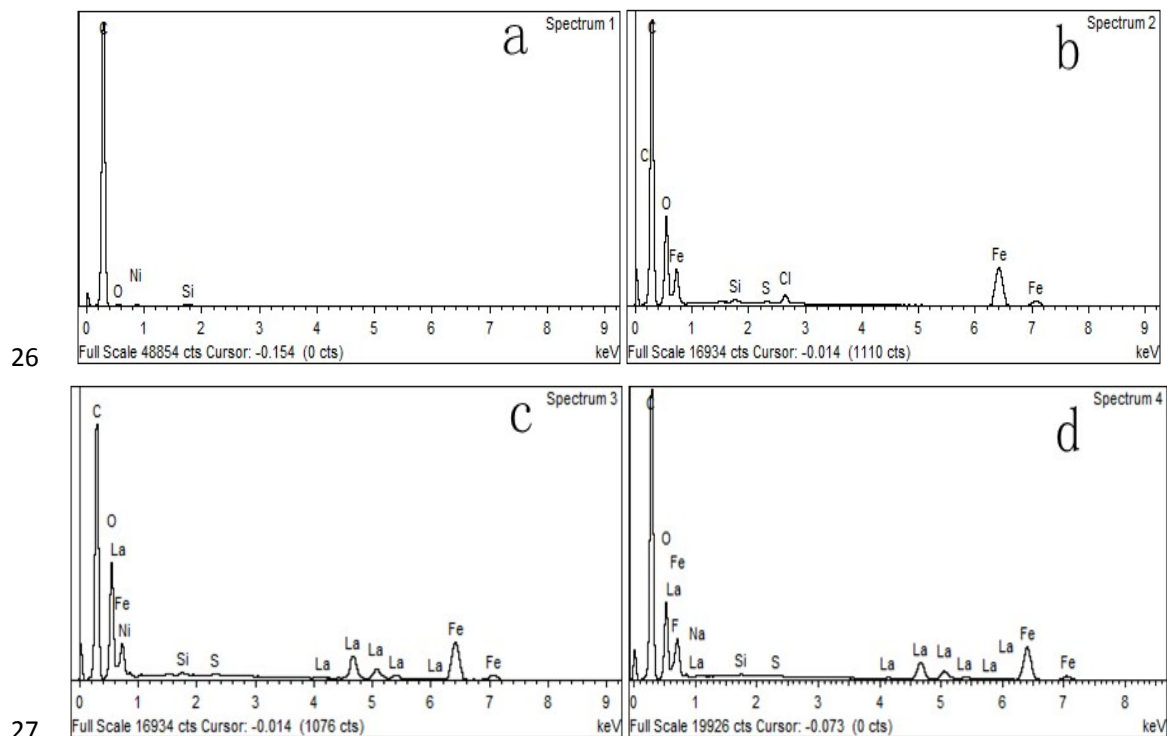

**Fig. S2.** EDX images: (a) NG; (b) MGNP; (c) MGLNP and (d) F<sup>-</sup> loaded MGLNP.

## 31 2 XRD patterns

32 X-ray diffraction patterns of all the samples were investigated by a X-ray  
 33 diffractometer, Model D8, BRUKER AXS, using Cu K $\alpha$  radiation ( $\alpha = 0.15425$  nm)  
 34 in the range of  $2\theta$  from  $10^\circ$  to  $90^\circ$ . The results are displayed in Fig. S3. In Fig. S3(A),  
 35 the typical peak of nano-graphite (NG) was identified at  $2\theta = 26.5^\circ$ . In Fig. S3(B), the  
 36 typical peaks of Fe<sub>3</sub>O<sub>4</sub> at  $2\theta = 30.2^\circ, 35.6^\circ, 43.2^\circ, 57.5^\circ$  and  $62.7^\circ$  indicated that the  
 37 nano-Fe<sub>3</sub>O<sub>4</sub> particles were loaded on the surface of NG. After the MGNP was  
 38 immersed by saturated La(NO<sub>3</sub>)<sub>3</sub>·6H<sub>2</sub>O solution and calcined at 300 °C for 3 h, the  
 39 nano-Fe<sub>3</sub>O<sub>4</sub> particles were transformed into  $\gamma$ -Fe<sub>2</sub>O<sub>3</sub>, Fig. S3(C) shows the X-ray  
 40 diffraction of  $\gamma$ -Fe<sub>2</sub>O<sub>3</sub>-graphite-La (MGLNP), which includes all the peaks of graphite,  
 41  $\gamma$ -Fe<sub>2</sub>O<sub>3</sub> and La ( $2\theta = 30.1^\circ, 38.2^\circ, 44.8^\circ, 49.8^\circ, 54.7^\circ$  and  $57.4^\circ$ ).<sup>2</sup>

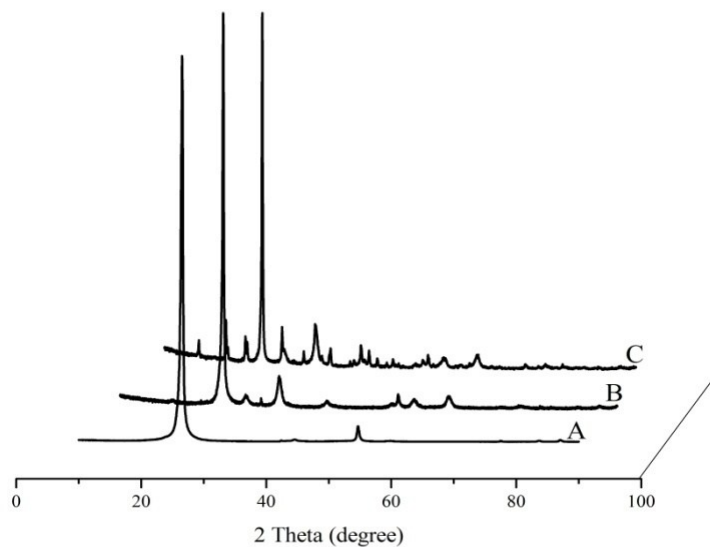

42

43

**Fig. S3.** XRD patterns: (A) NG; (B) MGNP and (C) MGLNP.

44

### 45 **3 Cost analysis**

46 On the basis of market investigation, the cost of MGLNP preparation was determined

47 as following:

48

**Tab. S1.** Cost analysis of MGLNP adsorbent.

| Item                                                 | Price                        | Dose per Kg<br>MGLNP | Cost<br>(US \$·kg <sup>-1</sup> MGLNP) | Total price<br>(US \$·kg <sup>-1</sup><br>MGLNP) |
|------------------------------------------------------|------------------------------|----------------------|----------------------------------------|--------------------------------------------------|
| Nanographite powder                                  | 76.92 US \$·kg <sup>-1</sup> | 0.43 kg              | 33.08                                  |                                                  |
| FeCl <sub>2</sub> ·4H <sub>2</sub> O                 | 1.38 US \$·kg <sup>-1</sup>  | 0.17 kg              | 0.24                                   |                                                  |
| FeCl <sub>3</sub> ·6H <sub>2</sub> O                 | 0.71 US \$·kg <sup>-1</sup>  | 0.45 kg              | 0.32                                   |                                                  |
| Ammonia                                              | 0.69 US \$·kg <sup>-1</sup>  | 0.98 kg              | 0.69                                   |                                                  |
| La(NO <sub>3</sub> ) <sub>3</sub> ·6H <sub>2</sub> O | 53.85 US \$·kg <sup>-1</sup> | 0.78 kg              | 42.00                                  | 79.71                                            |
| Concentrated nitric acid                             | 2.46 US \$·L <sup>-1</sup>   | 0.58 L               | 1.40                                   |                                                  |
| Concentrated sulfuric acid                           | 1.08 US \$·L <sup>-1</sup>   | 0.98 L               | 1.06                                   |                                                  |
| Water                                                | 0.77 US \$·t <sup>-1</sup>   | 0.15 t               | 0.12                                   |                                                  |
| Electricity                                          | 0.10 US \$·kW <sup>-1</sup>  | 8 kW                 | 0.80                                   |                                                  |

49 The cost of MGLNP could be divided into several items: materials and reagents,  
 50 water and electricity. In total, the price for MGLNP adsorbent is 79.71 US \$·kg<sup>-1</sup>,  
 51 which is higher than some low-cost adsorbents derived from either natural or waste  
 52 sources as show in Tab. S2.<sup>3</sup> However, MGLNP adsorbent had high adsorption  
 53 capacity of 77.12 mg·g<sup>-1</sup> at 25 °C, and even remained higher than 75% adsorption  
 54 capacity after three cycles of fluoride adsorption. Therefore, MGLNP adsorbent had a  
 55 potential for fluoride removal from drinking water.

56 **Tab. S2.** Comparison between various adsorbents used for fluoride removal on  
 57 the basis of adsorption capacity and cost of used material.

| <b>Adsorbent</b>           | <b>Adsorption capacity<br/>(mg·g<sup>-1</sup>)</b> | <b>Estimated cost<br/>(US \$·kg<sup>-1</sup>)</b> |
|----------------------------|----------------------------------------------------|---------------------------------------------------|
| Activated alumina          | 2.40                                               | ~2.30                                             |
| Amorphous alumina          | 3.60                                               | ~70.00                                            |
| Activated carbon (ALC-300) | 1.10                                               | ~25.00                                            |
| Calcite                    | 4.37×10 <sup>-5</sup>                              | ~0.11                                             |
| Clay (bentonite)           | 7.09                                               | ~1.00                                             |
| Charcoal                   | 7.88×10 <sup>-5</sup>                              | ~0.32                                             |
| Red mud                    | 6.28×10 <sup>-3</sup>                              | ~0.10                                             |
| Carbon slurry              | 4.86                                               | ~0.20                                             |
| MGLNP                      | 77.12                                              | ~79.71                                            |

#### 58 **4 Stability of the MGLNP**

59 The effects of temperature (25°C, 35°C and 50°C) and pH (4~10) on magnetic  
 60 separation and equilibrium adsorption capacity have been studied. The corresponding  
 61 experiments were conducted as below:

62 Firstly, several 100 ml MGLNP suspensions of 10 g·L<sup>-1</sup> in the polyethylene  
 63 bottles were shaken for 8 days at 160 rpm in the air bath thermostat oscillator.

64 Afterward, the MGLNP in the suspensions was separated under a magnetic field. Fig.  
65 S4 presented the magnetic separation results accordingly. As treated with different pH  
66 values or temperatures, the MGLNP could be easily separated with magnet, and the  
67 black opaque suspension rapidly changed to clear liquid.

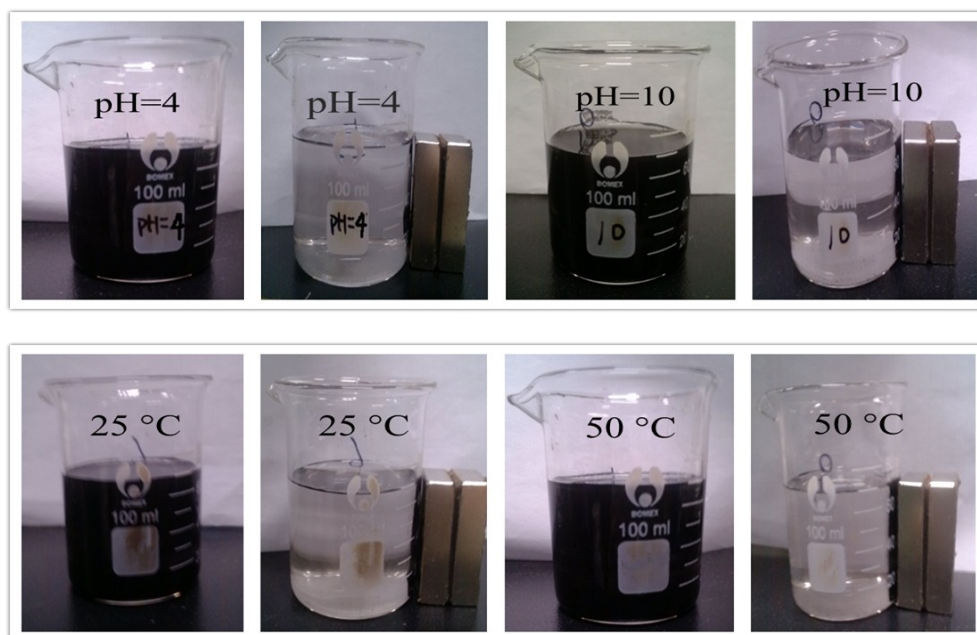

68

69

70 **Fig. S4.** Magnetic separation of treated MGLNP with different pH values or  
71 temperatures.

72 Subsequently, the magnetically separated MGLNP was dried at 60 °C for 8h.  
73 The fluoride adsorption experiments with these dried MGLNPs were carried out  
74 according to the procedure in section 2.3 of the manuscript. 20 mg MGLNP adsorbent  
75 was dosed into 100 ml F<sup>-</sup> solution with the concentration of 9.88 mg·L<sup>-1</sup>, then this  
76 suspension was shaken at 160 rpm and 25 °C in the air bath thermostat oscillator. Tab.  
77 S3 showed the corresponding equilibrium adsorption capacities ( $Q_e$ ).  
78

80 **Tab. S3.** Equilibrium adsorption capacities of treated MGLNP with different pH  
81 values or temperatures.

| $Q_e$ for original<br>MGLNP ( $\text{mg}\cdot\text{g}^{-1}$ ) | $Q_e$ for 8-day treated MGLNP ( $\text{mg}\cdot\text{g}^{-1}$ ) |          |          |          |          |          |           |           |           |           |
|---------------------------------------------------------------|-----------------------------------------------------------------|----------|----------|----------|----------|----------|-----------|-----------|-----------|-----------|
|                                                               | pH = 4.0                                                        | pH = 5.0 | pH = 6.0 | pH = 7.0 | pH = 8.0 | pH = 9.0 | pH = 10.0 | t = 25 °C | t = 35 °C | t = 50 °C |
| 18.10                                                         | 14.13                                                           | 16.63    | 17.27    | 17.80    | 17.63    | 17.77    | 17.93     | 18.03     | 17.97     | 17.27     |

82 As indicated in Tab. S3, most  $Q_e$  values of 8-day treated MGLNPs showed slight  
83 difference except for the 8-day treated MGLNP with pH = 4.0, which decreased from  
84 18.10  $\text{mg}\cdot\text{g}^{-1}$  of the original MGLNP to 14.13  $\text{mg}\cdot\text{g}^{-1}$ .

### 85 5 The quantitative analysis of the adsorption mechanism

86 In order to further analysis of defluorination mechanism, the fluoride removal data  
87 were estimated through quantitatively calculating the  $[\text{OH}^-]$  increase and the loaded  
88  $\text{La}^{3+}$  on the surface of MGLNP. The corresponding result is shown in Tab.3. The  
89 quantitative analysis of the adsorption mechanism is provided as following:

90 **Tab. S4.** The quantitative analysis of the adsorption mechanism (adsorbent dosage =  
91 200  $\text{mg}\cdot\text{L}^{-1}$ , 25 °C).

| Mechanism                                               | Before adsorption                                                 | After adsorption                                                | Difference                                                                         | Adsorption capacity ( $\text{mg}\cdot\text{g}^{-1}$ ) |
|---------------------------------------------------------|-------------------------------------------------------------------|-----------------------------------------------------------------|------------------------------------------------------------------------------------|-------------------------------------------------------|
| $\text{F}^-$ ion exchange with $\text{OH}^-$            | pH = 6.94                                                         | pH = 8.98                                                       | $\Delta[\text{F}^-] = \Delta[\text{OH}^-] =$<br>0.18 $\text{mg}\cdot\text{L}^{-1}$ | 0.90                                                  |
| Surface $\text{La}^{3+}$ complexation with $\text{F}^-$ | Loaded $\text{La}^{3+} = 254.26$<br>$\text{mg}\cdot\text{g}^{-1}$ | Adsorbed $\text{F}^- =$<br>104.31 $\text{mg}\cdot\text{g}^{-1}$ | $q = 104.31 \text{ mg}\cdot\text{g}^{-1}$                                          | 104.31                                                |

92 As indicated in Tab. 3, the calculated  $\text{F}^-$  adsorption capacity of MGLNP is  
93 105.21  $\text{mg}\cdot\text{g}^{-1}$ , which is higher than the maximal adsorption capacity ( $Q_m$ ) for fluoride  
94 determined with the Langmuir model were 77.12  $\text{mg}\cdot\text{g}^{-1}$  at 25 °C. This difference  
95 could be attributed to a part of  $\text{La}^{3+}$  loading on the MGLNP without  $\text{F}^-$  complexation.

96 Therefore, the calculated adsorption capacity of  $104.31\text{mg}\cdot\text{g}^{-1}$  was overestimated, and  
97 surface  $\text{La}^{3+}$  complexation mechanism played an important role in the fluoride  
98 removal by MGLNP.

## 99 **Reference**

- 100 1 L. Gao and L.G. Chen, *Microchim Acta*, 2013, 180, 423–430.
- 101 2 E. Vences-Alvarez, L.H. Velazquez-Jimenez, L.F. Chazaro-Ruiz, P.E. Diaz-Flores  
102 and J.R. Rangel-Mendez, *J Colloid Interface Sci*, 2015, 455, 194-202.
- 103 3 S. Jagtap, M.K. Yenkie, S. Das and S. Rayalu, *Desalination*, 2011, 273, 267-275.

104

105
